# Supplementary material for: Fabrication of sinter-free conductive Cu paste using sub-10 nm copper nanoparticles
Source: Royal Society of Chemistry journal article supplement (doi:10.1039/c7tc02893h), 2017-01-01
Supplement: c7tc02893h1.pdf [file c7tc02893h1.pdf]

Supplementary Information for

# Fabrication of Sinter-free Conductive Cu Paste using sub-10 nm Copper Nanoparticles

*Jungsup Lee<sup>†</sup>, Jaemoon Jun<sup>†</sup>, Wonjoo Na, Jungkyun Oh, Yunki Kim, Wooyoung Kim, and  
Jyongsik Jang \**

School of Chemical and Biological Engineering,

Seoul National University, 599 Gwanangno, Gwanakgu, Seoul 151-742, Korea

[\*] Prof. Jyongsik Jang

School of Chemical and Biological Engineering,

Seoul National University, 599 Gwanangno, Gwanakgu, Seoul 151-742, Korea

E-mail: [jsjang@plaza.snu.ac.kr](mailto:jsjang@plaza.snu.ac.kr)

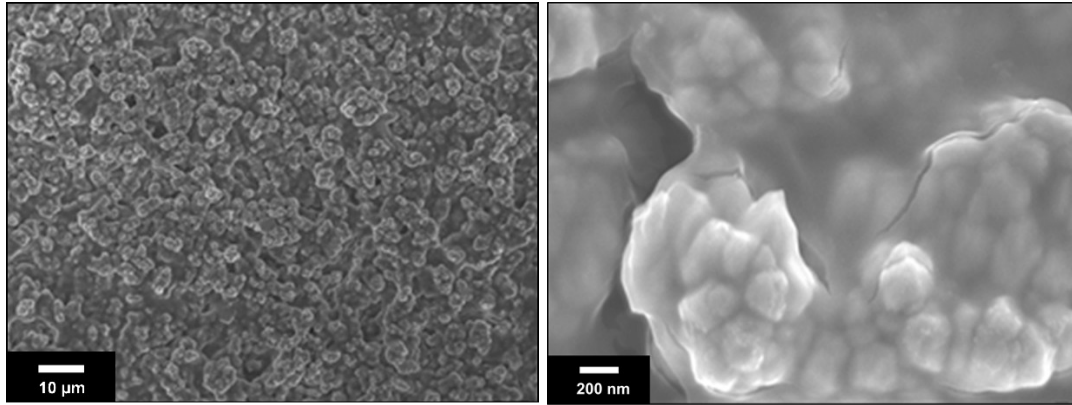

**Figure S1.** SEM images of CP-Cu Paste printed on a glass substrate. (thickness = 100 μm )

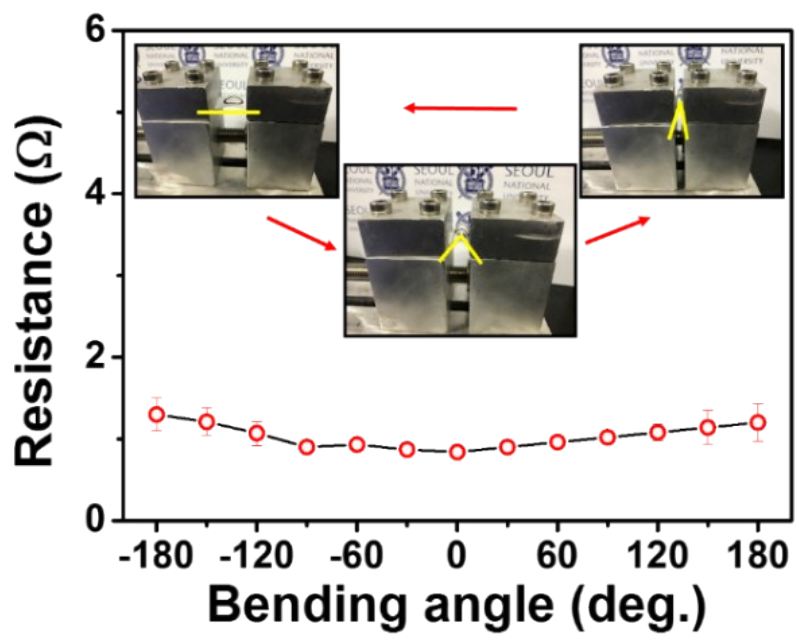

**Figure S2.** Bulk resistance changes of printed pattern of Cu NPs paste as a function of bending angle
